# Supplementary material for: Acceptorless dehydrogenative lactonization of diols by Pt-loaded SnO2 catalysts
Source: Royal Society of Chemistry journal article supplement (doi:10.1039/c5ra03337c), 2015-01-01
Supplement: c5ra03337c1.pdf [file c5ra03337c1.pdf]

## Supporting Information

### Acceptorless dehydrogenative lactonization of diols by Pt-loaded SnO<sub>2</sub> catalysts

Abeda Sultana Touchy,<sup>a</sup> Ken-ichi Shimizu\*<sup>a,b</sup>

<sup>a</sup> Catalysis Research Center, Hokkaido University, N-21, W-10, Sapporo 001-0021, Japan

<sup>b</sup> Elements Strategy Initiative for Catalysts and Batteries, Kyoto University, Katsura, Kyoto 615-8520, Japan

\*Corresponding author

Ken-ichi Shimizu

Catalysis Research Center, Hokkaido University, N-21, W-10, Sapporo 001-0021, Japan

E-mail: [kshimizu@cat.hokudai.ac.jp](mailto:kshimizu@cat.hokudai.ac.jp), Fax: +81-11-706-9163

## Experimental Section

*General:* Commercially available organic and inorganic compounds (from Tokyo Chemical Industry, Wako Pure Chemical Industries, Kishida Chemical, or Mitsuwa Chemicals) were used without further purifications. The GC (Shimadzu GC-14B) and GCMS (Shimadzu GCMS-QP2010) analyses were carried out with Ultra ALLOY capillary column UA<sup>+</sup>-5 (Frontier Laboratories Ltd.) using nitrogen as the carrier gas.

### NMR and GC/MS analysis

<sup>1</sup>H and <sup>13</sup>C NMR spectra for lactones of Table-3 were assigned and reproduced to the corresponding literature. <sup>1</sup>H and <sup>13</sup>C NMR spectra were recorded using at ambient temperature on JEOL-ECX 600 operating at 600.17 and 150.92 MHz, respectively with tetramethylsilane as an internal standard. All chemical shifts ( $\delta$ ) are reported in ppm and coupling constants ( $J$ ) in Hz. All chemical shifts are reported relative to tetramethylsilane and *d*-solvent peaks 77.00 ppm chloroform. Abbreviations used in the NMR experiments: s, singlet; d, doublet; t, triplet; q, quartet; m, multiplet. GC-MS spectra was taken by SHIMADZU QP2010.

### Isobenzofuran-1(3*H*)-one:<sup>1</sup>

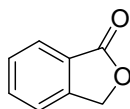

$^1\text{H}$  NMR (600.17 MHz,  $\text{CDCl}_3$ , TMS):  $\delta$  7.93 (d,  $J = 7.8$  Hz, 1H), 7.71-7.68 (m, 1H), 7.55-7.50 (m, 2H), 5.33 (s, 2H);  $^{13}\text{C}$  NMR (150.92 MHz,  $\text{CDCl}_3$ )  $\delta$  171.06, 146.46, 133.96, 128.95, 125.62, 125.58, 121.93, 69.60; GC-MS  $m/e$  134.08.

**3H-Naptho[2,3-c]furan-1-one:<sup>2</sup>**

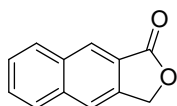

$^1\text{H}$  NMR (600.17 MHz,  $\text{CDCl}_3$ , TMS):  $\delta$  8.50 (s, 1H), 8.04 (d,  $J = 8.28$  Hz, 1H), 7.94 (d,  $J = 8.22$  Hz, 1H), 7.89 (s, 1H), 7.68-7.65 (m, 1H), 7.61-7.58 (m, 1H), 5.48 (s, 2H);  $^{13}\text{C}$  NMR (150.92 MHz,  $\text{CDCl}_3$ )  $\delta$  170.96, 139.93, 136.23, 133.11, 129.93, 128.98, 128.11, 127.06, 126.93, 123.31, 120.85, 69.61; GC-MS  $m/e$  184.05.

**3H-Benzo[d,e]isochromen-1-one:<sup>2</sup>**

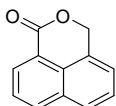

$^1\text{H}$  NMR (600.17 MHz,  $\text{CDCl}_3$ , TMS):  $\delta$  8.41 (d,  $J = 7.50$  Hz, 1H), 8.12 (d,  $J = 8.22$  Hz, 1H), 7.87 (d,  $J = 8.18$  Hz, 1H), 7.67 (t,  $J = 7.56$  Hz, 1H), 7.57 (t,  $J = 8.28$  Hz, 1H), 7.38 (d,  $J = 6.18$  Hz, 1H), 5.85 (s, 2H);  $^{13}\text{C}$  NMR (150.92 MHz,  $\text{CDCl}_3$ )  $\delta$  164.32, 135.33, 133.44, 131.72, 130.40, 127.47, 126.55, 125.79, 125.25, 121.54, 118.60, 70.14; GC-MS  $m/e$  184.01.

**Dibenzo[c,e]oxepin-5(7H)-one:<sup>1</sup>**

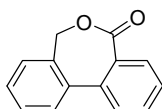

$^1\text{H}$  NMR (600.17 MHz,  $\text{CDCl}_3$ , TMS):  $\delta$  7.98 (d,  $J = 8.28$  Hz, 1H), 7.72-7.62 (m, 2H), 7.60-7.58 (m, 1H), 7.54-7.48 (m, 2H), 7.44-7.41 (m, 2H), 5.03 (s, 1H), 4.97 (s, 1H);  $^{13}\text{C}$  NMR (150.92 MHz,  $\text{CDCl}_3$ )  $\delta$  170.21, 138.90, 137.20, 134.26, 132.52, 131.86, 130.58, 130.07, 128.63, 128.60, 128.49, 128.36, 127.52, 69.12; GC-MS  $m/e$  210.10.

**Dihydrofuran-2(3H)-one:<sup>3</sup>**

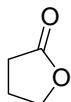

<sup>1</sup>H NMR (600.17 MHz, CDCl<sub>3</sub>, TMS): δ 4.27 (t, *J* = 7.02 Hz, 2H), 2.41 (t, *J* = 7.79 Hz, 2H), 2.22-2.17 (m, 2H); <sup>13</sup>C NMR (150.92 MHz, CDCl<sub>3</sub>) δ 177.65, 68.36, 27.54, 21.92; GC-MS m/e 86.07.

**Tetrahydro-2H-pyran-2-one:<sup>1</sup>**

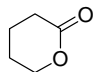

<sup>1</sup>H NMR (600.17 MHz, CDCl<sub>3</sub>, TMS): δ 4.35 (t, *J* = 5.58 Hz, 2H), 2.56 (t, *J* = 7.20 Hz, 2H), 1.92-1.86 (m, 4H); <sup>13</sup>C NMR (150.92 MHz, CDCl<sub>3</sub>) δ 171.27, 69.31, 29.66, 22.12, 18.91; GC-MS m/e 100.055.

**Oxepan-2-one:<sup>4</sup>**

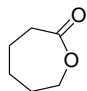

<sup>1</sup>H NMR (600.17 MHz, CDCl<sub>3</sub>, TMS): δ 4.16 (t, *J* = 4.53 Hz, 2H), 2.56 (t, *J* = 6.08 Hz, 2H), 1.79-1.77 (m, 2H), 1.71-1.67 (m, 4H); <sup>13</sup>C NMR (150.92 MHz, CDCl<sub>3</sub>) δ 176.07, 69.10, 34.32, 29.05, 28.68, 22.71; GC-MS m/e 114.05.

**4-Methyl-oxetan-2-one:<sup>5</sup>**

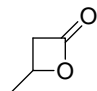

<sup>1</sup>H NMR (600.17 MHz, CDCl<sub>3</sub>, TMS): δ 4.56-4.52 (m, 1H), 3.52-3.50 (m, 1H), 3.12-3.10 (m, 1H), 1.51 (d, *J* = 6.28 Hz, 3H); <sup>13</sup>C NMR (150.92 MHz, CDCl<sub>3</sub>) δ 171.05, 64.39, 35.82, 20.96; GC-MS m/e 86.11

#### 4-Methyl-tetrahydro-pyran-2-one:<sup>6</sup>

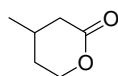

<sup>1</sup>H NMR (600.17 MHz, CDCl<sub>3</sub>, TMS): δ 4.43-4.39 (m, 1H), 4.18-4.17 (m, 1H), 2.60-2.58 (m, 1H), 2.22-2.26 (m, 2H), 1.85-1.79 (m, 1H), 1.60-1.55 (m, 1H), 1.09 (d, *J* = 6.18 Hz, 3H); <sup>13</sup>C NMR (150.92 MHz, CDCl<sub>3</sub>) δ 171.27, 68.43, 37.96, 30.35, 26.29, 21.18; GC-MS *m/e* 114.06.

#### 3,5-Diethyl-tetrahydro-pyran-2-one:

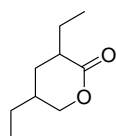

<sup>1</sup>H NMR (600.17 MHz, CDCl<sub>3</sub>, TMS): δ 4.21-4.19 (m, 1H), 4.12-4.11 (m, 1H), 2.30-2.28 (m, 2H), 2.14-2.199 (m, 2H), 1.62-1.58 (m, 2H), 1.38-1.35 (m, 2H), 0.83-0.85 (m, 6H); <sup>13</sup>C NMR (150.92 MHz, CDCl<sub>3</sub>) δ 175.01, 72.53, 40.90, 38.32, 34.67, 24.54, 22.35, 11.09, 10.87; GC-MS *m/e* 156.15.

#### Hexahydro-isobenzo-furan-1-one:<sup>7</sup>

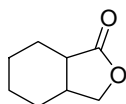

<sup>1</sup>H NMR (600.17 MHz, CDCl<sub>3</sub>, TMS): δ 4.21-4.19 (m, 1H), 3.95-3.91 (m, 1H), 2.64-2.70 (m, 1H), 2.54-2.49 (m, 1H), 1.94-1.92 (m, 1H), 1.68-1.57 (m, 4H), 1.28-1.20 (m, 3H); <sup>13</sup>C NMR (150.92 MHz, CDCl<sub>3</sub>) δ 178.26, 71.84, 39.23, 35.77, 26.57, 23.41, 22.84, 22.43; GC-MS *m/e* 140.10.

#### References

1. S. Jhulki, S. Seth, M. Mondal, J. N. Moorthy, *Tetrahedron*, 2014, **70**, 2286–2293.
2. K. I. Fujita, w. Ito, R. Yamaguchi, *ChemCatChem.*, 2014, **6**, 109–112.
3. X. Li, Y. Cui, X. Yang, W. L. Dai, K. Fan, *Appl. Catal. A : General*, 2013, **458**, 63–70.
4. T. Buntara, S. Noel, P. H. Phua, I. M. Cabrera, J. G. Vries and H. J. Heeres, *Angew. Chem. Int. Ed.*, 2011, **50**, 7083–7087.
5. M. C. Bagley, Z. Lin, D. J. Philips, A. E. Graham, *Tetrahedron Lett.*, 2009, **50**, 6823–6825.
6. T. Tokoroyama, H. Kusaka, *Can. J. Chem.*, 1996, **74**, 2487–2502.
7. Y. Endo, J. E. Bäckvall, *Chem. Eur. J.*, 2011, **17**, 12596–12601.
